# Supplementary material for: Reduction of the Vertebral Bone Mineral Density in Patients with Hodgkin Lymphoma Correlates with Their Age and the Treatment Regimen They Received
Source: MDPI journal article supplement (doi:10.3390/cancers14030495), 2022-01-19
Supplement: s1 [file s1]

## Supplementary Materials

**Table S1.** Vertebral BMD at baseline, end of therapy and 6-months post-therapy analyzed according to patient gender and age cutoff of 45 years.

| Evaluated Parameters                                                    | Median (Range)     | Females <45 Years vs. Males <45 Years     |                 | Males & Females ≥45 Years vs. Males <45 Years |                 | Males & Females ≥45 Years vs. Females <45 Years |                 |
|-------------------------------------------------------------------------|--------------------|-------------------------------------------|-----------------|-----------------------------------------------|-----------------|-------------------------------------------------|-----------------|
|                                                                         | No. of pts<br>213  | No. of pts<br>98 vs. 83                   | <i>p</i> -Value | No. of pts<br>32 vs. 83                       | <i>p</i> -Value | No. of pts:<br>32 vs. 98                        | <i>p</i> -Value |
| Age, years, median (range)                                              | 29 (18–59)         | 28 (18–45) vs. 27 (18–45)                 | 0.488           | 54 (47–59) vs. 27 (18–45)                     | 0.000           | 54 (47–59) vs. 28 (18–45)                       | 0.000           |
| Baseline BMD *, HU, median (range)                                      | 196.8 (30.5–320)   | 212.9 (30.5–320) vs. 200.4 (101.2–273.8)  | 0.073           | 138.9 (92–192.9) vs. 200.4 (101.2–273.8)      | 0.000           | 138.9 (92–192.9) vs. 212.9 (30.5–320)           | 0.000           |
| EOT BMD **, HU, median (range)                                          | 164.9 (27.5–277.3) | 170.6 (27.5–277.3) vs. 174.1 (74.5–267)   | 0.807           | 112.5 (64.3–172.5) vs. 174.1 (74.5–267)       | 0.000           | 112.5 (64.3–172.5) vs. 170.6 (27.5–277.3)       | 0.000           |
| Δ between EOT and baseline BMD, %, median (range)                       | 15.4 (0–54.6)      | 17.9 (0–42.1) vs. 13 (0–54.6)             | 0.107           | 17.1 (0–52.1) vs. 13 (0–54.6)                 | 0.015           | 17.1 (0–52.1) vs. 17.9 (0–42.1)                 | 0.192           |
|                                                                         | No. of pts<br>161  | No. of pts<br>80 vs. 56                   | <i>p</i> -value | No. of pts<br>25 vs. 56                       | <i>p</i> -value | No. of pts<br>25 vs. 80                         | <i>p</i> -value |
| 6 months post-EOT BMD *** HU, median (range)                            | 169 (23.9–301)     | 181 (23.9–301) vs. 176.8 (102–275.7)      | 0.377           | 110 (69.3–168.7) vs. 176.8 (102–275.7)        | 0.000           | 110 (69.3–168.7) vs. 181 (23.9–301)             | 0.000           |
| Δ between 6 months post-EOT and baseline BMD, %, median (range)         | 11.7 (0–49.8)      | 12.9 (0–37.9) vs. 8.6 (0–41.3)            | 0.194           | 23.7 (0–49.8) vs. 8.6 (0–41.3)                | 0.000           | 23.7 (0–49.8) vs. 12.9 (0–37.9)                 | 0.000           |
|                                                                         | No. of pts<br>213  | No. of pts<br>98 vs. 83                   | <i>p</i> -value | No. of pts<br>32 vs. 83                       | <i>p</i> -value | No. of pts:<br>32 vs. 98                        | <i>p</i> -value |
| Cumulative HE dose, mg, median (range)                                  | 6000 (1600–22,400) | 6000 (2000–19,140) vs. 6000 (1600–22,400) | 0.145           | 7325 (2000–20,040) vs. 6000 (1600–22,400)     | 0.802           | 7325 (2000–20,040) vs. 6000 (2000–19,140)       | 0.101           |
| Cumulative HE dose per body surface, mg/m <sup>2</sup> , median (range) | 3468 (952–11,546)  | 3529 (1,170–10,950) vs. 3243 (952–11,546) | 0.365           | 4152 (995–10,277) vs. 3243 (952–11,546)       | 0.958           | 4152 (995–10,277) vs. 3529 (1,170–10,950)       | 0.785           |

\* HL staging PET/CT (non-IV contrast CT) scans were used to measure the baseline vertebral BMD at the L3 level. \*\* HL PET/CT (non-IV contrast CT) scans performed at the end of treatment were used to measure vertebral BMD at that time point. \*\*\* HL PET/CT (non-IV contrast CT) scans performed 6 months after the end of treatment were used to measure vertebral BMD at that time point. Mann-Whitney *p*-value; BMD: bone mineral density; no. of pts: number of patients; EOT: end-of-treatment; HU: Hounsfield units; Δ: difference; HE: hydrocortisone equivalent; y.o.: years old.

**Table S2.** BMD decrease of >15% between baseline and the end of treatment according to a cumulative hydrocortisone equivalent dose per body surface used in different treatment protocols: Bi-variate log regression analysis.

|                                                               | HE Dose per Surface Area (mg/m <sup>2</sup> ) | No. of Patients | Patients with BMD Decrease of >15% |         |                  |
|---------------------------------------------------------------|-----------------------------------------------|-----------------|------------------------------------|---------|------------------|
|                                                               |                                               |                 | no. (%)                            | p-value | OR               |
| <b>Cumulative HE dose per surface area (mg/m<sup>2</sup>)</b> | ≤2100                                         | 24              | 5 (20.83)                          | 0.000   | 1.00             |
|                                                               | 2100.1–3400                                   | 73              | 26 (35.62)                         | 0.184   | 2.1 (0.7–6.3)    |
|                                                               | >3400                                         | 116             | 71 (61.21)                         | 0.001   | 6 (2.1–17.2)     |
| <b>Males ≤45 y.o.</b>                                         | ≤2100                                         | 12              | 1 (8.33)                           | 0.091   | 1.00             |
|                                                               | 2100.1–3400                                   | 34              | 13 (38.24)                         | 0.082   | 6.81 (0.8–59.1)  |
|                                                               | >3400                                         | 37              | 18 (48.65)                         | 0.032   | 10.42 (1.2–89.1) |
| <b>Males &gt;45 y.o. and all females</b>                      | ≤2100                                         | 12              | 4 (33.33)                          | 0.001   | 1.00             |
|                                                               | 2100.1–3400                                   | 39              | 13 (33.33)                         | 1       | 1 (0.3–3.9)      |
|                                                               | >3400                                         | 79              | 53 (67.09)                         | 0.033   | 4.08 (1.1–14.8)  |
| <b>ABVD ×2–4</b>                                              | ≤1800                                         | 8               | 1 (12.50)                          | 0.472   | 1.00             |
|                                                               | 1800.1–2100                                   | 15              | 4 (26.67)                          | 0.443   | 2.55 (0.2–27.7)  |
|                                                               | <2100                                         | 25              | 3 (12.00)                          | 0.97    | 0.96 (0.1–10.7)  |
| <b>ABVD ×6</b>                                                | ≤2600                                         | 3               | 1 (33.33)                          | 0.298   | 1.00             |
|                                                               | 2600.1–3399                                   | 45              | 22 (48.89)                         | 0.607   | 1.91 (0.2–22.6)  |
|                                                               | <3400                                         | 51              | 32 (62.75)                         | 0.335   | 3.37 (0.3–39.7)  |
| <b>EB ×2 + ABVD ×4</b>                                        | ≤5600                                         | 17              | 13 (76.47)                         |         | 1.00             |
|                                                               | >5600                                         | 21              | 16 (76.19)                         | 0.984   | 0.99 (0.2–4.4)   |
| <b>EB ×4–6</b>                                                | ≤8000                                         | 9               | 4 (44.44)                          |         | 1.00             |
|                                                               | >8000                                         | 19              | 6 (31.58)                          | 0.509   | 0.58 (0.1–3)     |
| <b>EB ×2–6</b>                                                | ≤5600                                         | 18              | 13 (72.22)                         | 0.012   | 1.00             |
|                                                               | 5600–8000                                     | 28              | 19 (67.86)                         | 0.754   | 0.81 (0.2–3)     |
|                                                               | >8000                                         | 20              | 7 (35.00)                          | 0.025   | 0.21 (0.1–0.8)   |

BMD: bone mineral density; HE: hydrocortisone equivalent; y.o.: years old; OR: odds ratio; ABVD: adriamycin, bleomycin, vinblastine, dacarbazine; EB: escalated BEACOPP, including bleomycin, etoposide, adriamycin, cyclophosphamide, oncovin, procarbazine, prednisone.
